# Supplementary material for: Reconsideration of the optimal minimum lymph node count for young colon cancer patients: a population-based study
Source: BMC Cancer. 2018 Jun 1;18:623. doi: 10.1186/s12885-018-4428-0 (PMC5984774; doi:10.1186/s12885-018-4428-0)
Supplement: Supplementary file 1 — Table S1. Univariate and multivariate analysis for CC patients aged < 40. (DOCX 18 kb) [file 12885_2018_4428_MOESM1_ESM.docx]

**Supplementary Table 1** Univariate and multivariate analysis for CC patients aged <40.

| Characteristics | | Univariate analysis | | Multivariate analysis | |
| --- | --- | --- | --- | --- | --- |
| HR [95%CI] | P | HR [95%CI] | P |
| Nodes examined | <12 | 1 | 0.010 | 1 | <0.001 |
| ≥12 | 0.68 [0.51-0.91] | 0.57 [0.43-0.78] |
| Gender | Male | 1 | 0.005 | 1 | 0.010 |
| Female | 1.37 [1.10-1.70] | 0.75 [0.60-0.93] |
| Race | White | 1 | <0.001 | 1 | <0.001 |
| Black | 1.64 [1.23-2.18] | 1.82 [1.36-2.43] |
| Others | 1.57 [1.16-2.13] | 1.40 [1.03-1.90] |
| AJCC stage | Stage Ⅰ | 1 | <0.001 | 1 | 0.890 |
| Stage Ⅱ | 2.87 [1.38-5.99] | 2.70 [1.15-5.14] |
| Stage Ⅲ | 4.63 [3.27-6.45] | 4.11 [2.98-6.21] |
| T stage | T1/T2 | 1 | <0.001 | 1 | 0.001 |
| T3/T4 | 4.38 [2.69-7.14] | 3.12 [1.59-6.10] |
| N stage | N0 | 1 | <0.001 | 1 | 0.782 |
| N1/N2 | 3.67 [2.82-4.77] | 3.31 [2.48-4.91] |
| Tumor location | Left-sided colon | 1 | 0.858 | 1 | 0.126 |
| Right-sided colon | 0.98 [0.79-1.22] | 0.83 [0.65-1.06] |
| Histological type | Adenocarcinoma | 1 | <0.001 | 1 | 0.016 |
| Mucous/signet-ring cell | 1.74 [1.33-2.28] | 1.46 [1.11-1.92] |
| Others | 2.30 [0.95-5.57] | 1.67 [0.74-3.81] |
| Grade | Grade Ⅰ/Grade Ⅱ | 1 | <0.001 | 1 | <0.001 |
| Grade Ⅲ/Grade Ⅳ | 2.22 [1.78-2.78] | 1.73 [1.37-2.19] |
| Surgical type | Hemicolectomy | 1 | 0.002 | 1 | 0.004 |
| Segmental resection | 1.45 [1.15-1.83] | 0.68 [0.53-0.89] |
| Tumor size (cm) | <5 | 1 | 0.027 | 1 | 0.650 |
| ≥5 | 1.29 [1.03-1.60] | 1.06 [0.83-1.34] |

*Others: American Indian/AK Native, Asian/Pacific Islander.
